# Supplementary material for: PU.1-c-Jun interaction is crucial for PU.1 function in myeloid development
Source: PubMed Central journal article supplement (PMC9474506; doi:10.1038/s42003-022-03888-7), 2022-09-14
Supplement: 42003_2022_3888_MOESM2_ESM.pdf [file 42003_2022_3888_MOESM2_ESM.pdf]

## Description of Additional Supplementary Files

**File name:** Supplementary Data 1

**Description:** Numerical source data behind main figure graphs.
